# Supplementary material for: Improved health-span and lifespan in mtDNA mutator mice treated with the mitochondrially targeted antioxidant SkQ1
Source: publisher site journal article supplement (doi:10.18632/aging.101174), 2017-02-15
Supplement: Supplementary file 1 [file aging-v9i2-101174-supplementary-material-SD1.pdf]

**SUPPLEMENTARY MATERIAL**

**Supplementary Table S1. Scoring of mouse phenotype.**

| Age, days<br>Symptom     | 290 days |            | 301 days |            | 311 days            |            |
|--------------------------|----------|------------|----------|------------|---------------------|------------|
|                          | value    | severity   | value    | severity   | value               | severity   |
| Porphyria                |          | 0          |          | 0          |                     | 0          |
| Weight (loss)            | 23.7     | 1.5        | 23.3     | 2.0        | 22.5                | 2.5        |
| Diarrhea                 |          | 0          |          | 0          |                     | 0          |
| Temperature (loss)       | 35.5     | 0.5        | 35.3     | 1.0        | 34.5                | 2.5        |
| Kyphosis                 |          | 1.5        |          | 1.5        |                     | 1.5        |
| Lowered activity         |          | 1.0        |          | 0.5        | Disco-<br>ordinated | 2.0        |
| Fur loss                 |          | 0.5        |          | 0.5        |                     | 0.5        |
| Cleaning, grooming       |          | 0.5        |          | 0.5        |                     | 0.5        |
| Dehydration grade        |          | 1.0        |          | 1.0        |                     | 1.0        |
| Piloerection             |          | 0.5        |          | 0.5        |                     | 2.5        |
| Paleness                 |          | 2.0        |          | 2.0        |                     | 2.0        |
| <i>General condition</i> |          | <i>1.5</i> |          | <i>1.5</i> |                     | <i>2.5</i> |

Example of part of an evaluation protocol for a single mouse. For each parameter, the scale goes to 3.0. The mice were euthanized when the General Condition value exceeded 2.5 (or any other evident reason was observed).
